# Supplementary material for: Mental Health as a Mediator of the Association Between Educational Inequality and Cardiovascular Disease: A Mendelian Randomization Study
Source: PubMed Central journal article supplement (PMC8649303; doi:10.1161/jaha.120.019340), 2021-09-02

# **Supplemental Material**

## Data S1.

### Supplemental Methods

#### Methods for co-variates used in observational analysis

For age and sex, individuals were classified according to reported age and sex at time of recruitment. Individual smoking status was classified according to whether an individual reported never smoking, being a previous smoker or being a current smoker. Individuals were classified as having hypertension if their health records showed a diagnosis as classified by ICD code I10 and obesity if their records showed a diagnosis as classified by ICD code E66. Socioeconomic position was estimated using Townsend Deprivation Index (TDI) at birth.

#### Methods for sensitivity analyses

*Additional MR tests:* The regression dilution  $I^2$  statistic was used to assess the suitability of the genetic instrument for use in the MR Egger method<sup>55</sup>. If the  $I^2$  statistic was less than 0.9, then SIMEX corrections were conducted. This statistic also serves to measure potential bias arising from measurement error with values close to 1 indicating minimal attenuation. We also assessed the strength of the genetic instruments using the Mean F-statistic, with a value above 10 indicating adequate instrument strength<sup>56</sup>. In addition, we conducted a Cochran's Q-test to assess for heterogeneity<sup>57</sup> and then utilised the MR Egger intercept in order to assess for directional pleiotropy. We also applied Steiger filtering directionality tests to assess for reverse causation by identifying genetic variants that explain more variance in the outcome than the exposure<sup>58</sup>.

*Bidirectionality:* As a sensitivity analysis, we investigated the directionality of these effects by measuring the effect of cardiovascular disease on our proposed mediators having adjusted for age, sex and SES.

*Additional mediators:* We also investigated whether personality traits such as depressed affect and worry were mediating the relationship between educational attainment and cardiovascular disease, rather than mental health problems. These traits were depressed affect and worry with instruments created based on summary data from a recent GWAS meta-analysis of neuroticism<sup>59</sup>. This included 12 cohorts with a total of 449,484 individuals and identified 136 independent genome-wide significant loci for neuroticism, depressed affect and worry.

*Smoking as a mediator between mental health problems and cardiovascular disease:* Finally, we investigated whether smoking behaviours further mediated the pathway from mental health problems to cardiovascular disease using multivariable regression and MR approaches. For the observational analyses, we used UK Biobank data and classified participants on a never vs ever smoker basis. For the MR analyses, we constructed an instrument for smoking initiation using summary data from the GSCAN GWAS<sup>60</sup> which defined smoking initiation as ever having smoked more than 100 cigarettes, smoking every day for at least a month or smoking regularly. The sample size was 1,232,091 and it identified 378 independent genome-wide significant genetic loci which explain 4% of the variance in smoking initiation. We used the same summary data reporting cardiovascular disease for our outcome as before.

We utilised the product of co-efficients method as described in our main methods to calculate the proportion mediated statistic. Effects were estimated using logistic regression for our traditional observational data and two-step MR for our genetic instruments. In the first step when calculating the indirect effects, we adjusted for age, sex, educational attainment, obesity, socio-economic position and hypertension in our logistic regression. In the second step, we adjusted for age, sex and depression in the logistic regression and depression only in the two-step MR. Standard errors were calculated using the delta method.

**Table S1. International Standard for Classification of Education (ISCED) codes applied to levels of qualification reported in UK biobank data.**

| <b>Highest Level of Qualification</b>        | <b>ISCED Code</b> | <b>Years of full-time Education</b> |
|----------------------------------------------|-------------------|-------------------------------------|
| College/University Degree                    | 5                 | 20                                  |
| National Vocational Qualification/equivalent | 5                 | 19                                  |
| Other professional qualification             | 4                 | 15                                  |
| A-levels/AS/Equivalent                       | 3                 | 13                                  |
| GCSE/CSE/O-Level/Equivalent                  | 2                 | 10                                  |
| None of the above                            | 1                 | 7                                   |
| Prefer not to say                            | N/A               | Excluded                            |

**Table S2. Reported demographics in UK Biobank for co-variates utilised in observational analysis.**

| <b>Co-Variate</b>                      |         | <b>Demographics</b> |
|----------------------------------------|---------|---------------------|
| Age in years (mean (SD))               |         | 56.9 (8)            |
| Sex (%)                                | Male    | 46                  |
|                                        | Female  | 54                  |
| Smoking Status (%)                     | Never   | 55.2                |
|                                        | Former  | 35.5                |
|                                        | Current | 9.3                 |
| Hypertension (%)                       |         | 18.7                |
| Obesity (%)                            |         | 2.6                 |
| Townsend Deprivation Index (mean (SD)) |         | -1.58 (2.93)        |

**Table S3. Full results of MR univariable analysis.**

| Exposure               | Outcome                         | Method                          | SNPs | OR (95% CI)       | P-value               |
|------------------------|---------------------------------|---------------------------------|------|-------------------|-----------------------|
| Educational Attainment | Cardiovascular Disease          | Inverse Variance Weighted (IVW) | 1206 | 0.62 (0.58-0.66)  | $3.5 \times 10^{-50}$ |
|                        |                                 | MR Egger Simex (Unweighted)     | 1206 | 0.73 (0.58-0.91)  | 0.004                 |
|                        |                                 | Weighted Median                 | 1206 | 0.64 (0.59-0.70)  | $1.1 \times 10^{-24}$ |
|                        |                                 | Weighted Mode                   | 1206 | 0.71 (0.47-1.06)  | 0.10                  |
|                        | Major depressive Disorder (MDD) | IVW                             | 1068 | 0.72 (0.67-0.77)  | $8.0 \times 10^{-22}$ |
|                        |                                 | MR Egger Simex (Unweighted)     | 1068 | 0.62 (0.51-0.75)  | $1.8 \times 10^{-6}$  |
|                        |                                 | Weighted Median                 | 1068 | 0.75 (0.69-0.81)  | $4.9 \times 10^{-12}$ |
|                        |                                 | Weighted Mode                   | 1068 | 0.98 (0.61-1.57)  | 0.94                  |
|                        | Anxiety Disorder                | IVW                             | 1151 | 0.50 (0.42-0.59)  | $8.8 \times 10^{-16}$ |
|                        |                                 | MR Egger Simex (Weighted)       | 1151 | 0.49 (0.21-1.14)  | 0.10                  |
|                        |                                 | Weighted Median                 | 1151 | 0.50 (0.39-0.66)  | $3.5 \times 10^{-7}$  |
|                        |                                 | Weighted Mode                   | 1151 | 0.60 (0.21-1.70)  | 0.33                  |
|                        | Mental Health Problems          | IVW                             | 568  | 0.95 (0.94-0.96)  | $7 \times 10^{-12}$   |
|                        |                                 | MR Egger Simex (Unweighted)     | 568  | 0.97 (0.93-1.02)  | 0.20                  |
|                        |                                 | Weighted Median                 | 568  | 0.95 (0.93-0.96)  | $7.2 \times 10^{-11}$ |
|                        |                                 | Weighted Mode                   | 568  | 0.91 (0.86-0.97)  | 0.002                 |
| MDD                    | Cardiovascular Disease          | IVW                             | 39   | 1.09 (0.98-1.22)  | 0.13                  |
|                        |                                 | Weighted Median                 | 39   | 1.10 (0.95-1.28)  | 0.20                  |
|                        |                                 | Weighted Mode                   | 39   | 1.20 (0.90-1.61)  | 0.23                  |
| Anxiety                |                                 | IVW                             | 94   | 1.01 (0.99-1.02)  | 0.27                  |
|                        |                                 | MR Egger Simex (Unweighted)     | 94   | 1.01 (0.98-1.04)  | 0.42                  |
|                        |                                 | Weighted Median                 | 94   | 1.01 (0.99-1.03)  | 0.29                  |
|                        |                                 | Weighted Mode                   | 94   | 1.01 (0.98-1.04)  | 0.59                  |
|                        |                                 | MR RAPS                         | 94   | 1.01 (1.00-1.03)  | 0.13                  |
| Mental Health Problems |                                 | IVW                             | 13   | 2.68 (1.32-5.44)  | 0.01                  |
|                        |                                 | Weighted Median                 | 13   | 2.79 (1.06-7.33)  | 0.04                  |
|                        |                                 | Weighted Mode                   | 13   | 2.41 (0.42-13.80) | 0.34                  |
| MDD                    | Lifetime Smoking                | IVW                             | 35   | 1.07 (1.03-1.12)  | $1.5 \times 10^{-3}$  |
|                        |                                 | Weighted Median                 | 35   | 1.07 (1.04-1.10)  | $8.5 \times 10^{-6}$  |
|                        |                                 | Weighted Mode                   | 35   | 1.08 (1.02-1.14)  | $9.6 \times 10^{-3}$  |
| Lifetime Smoking       | Cardiovascular Disease          | IVW                             | 120  | 1.87 (1.49-2.36)  | $9.3 \times 10^{-8}$  |
|                        |                                 | MR Egger Simex (Unweighted)     | 120  | 0.68 (0.31-1.53)  | 0.35                  |
|                        |                                 | Weighted Median                 | 120  | 2.07 (1.53-2.79)  | $2.1 \times 10^{-6}$  |
|                        |                                 | Weighted Mode                   | 120  | 2.35 (1.00-5.52)  | 0.05                  |

**Table S4. Regression dilution  $I^2_{GX}$  to test the suitability of instruments for MR Egger and the mF statistic as a test of instrument strength for MR univariable analysis.**

| <b>Exposure</b>        | <b>Outcome</b>                  | <b>mF</b> | <b><math>I^2</math> Unweighted <math>G_X</math></b> | <b><math>I^2</math> Weighted <math>G_X</math></b> |
|------------------------|---------------------------------|-----------|-----------------------------------------------------|---------------------------------------------------|
| Educational Attainment | Cardiovascular disease          | 46.66     | 0.732                                               | 0.568                                             |
|                        | Major Depressive Disorder (MDD) | 46.64     | 0.736                                               | 0.556                                             |
|                        | Anxiety                         | 47.10     | 0.689                                               | 0.766                                             |
|                        | Mental Health Presentation      | 48.37     | 0.770                                               | 0.574                                             |
| MDD                    | Cardiovascular disease          | 36.63     | 0                                                   | 0                                                 |
| Anxiety                |                                 | 18.51     | 0.524                                               | 0                                                 |
| Mental Health Problems |                                 | 36.80     | 0                                                   | 0                                                 |
| MDD                    | Lifetime Smoking                | 37.95     | 0                                                   | 0                                                 |
| Lifetime Smoking       | Cardiovascular disease          | 44.05     | 0.644                                               | 0.454                                             |

**Table S5. The number of SNPs from the genetic instruments in the MR univariable analysis that explain more of the variance in the exposure than the outcome according to Steiger directionality tests.**

| <b>Exposure</b>        | <b>Outcome</b>                  | <b>True (%)</b> | <b>FALSE</b> |
|------------------------|---------------------------------|-----------------|--------------|
| Educational Attainment | Cardiovascular disease          | 1206 (95.3)     | 60           |
|                        | Mental health problems          | 595 (100)       | 0            |
|                        | Major Depressive Disorder (MDD) | 1228 (96.6)     | 51           |
|                        | Anxiety                         | 702 (58.2)      | 505          |
| Mental health problems | Cardiovascular disease          | 12 (92.3)       | 1            |
| MDD                    |                                 | 40 (100)        | 0            |
| Anxiety                |                                 | 95 (100)        | 0            |
| MDD                    | Lifetime Smoking                | 36 (100)        | 0            |
| Lifetime Smoking       | Cardiovascular Disease          | 116 (92.1)      | 10           |

**Table S6. Cochran's Q Tests of Heterogeneity for MR univariable analysis.**

| <b>Exposure</b>        | <b>Outcome</b>                  | <b>IVW Q<br/>(Degrees of freedom)</b> | <b>IVQ Q<br/>P-value</b> |
|------------------------|---------------------------------|---------------------------------------|--------------------------|
| Educational Attainment | Cardiovascular Disease          | 1499.43 (1205)                        | <0.001                   |
|                        | Mental Health Problems          | 1193.86 (567)                         | <0.001                   |
|                        | Major Depressive Disorder (MDD) | 1901.98 (1067)                        | <0.001                   |
|                        | Anxiety                         | 1111.07 (1150)                        | 0.79                     |
| Mental Health Problems | Cardiovascular disease          | 11.72 (12)                            | 0.47                     |
|                        | MDD                             | 47.81 (38)                            | 0.13                     |
|                        | Anxiety                         | 95.85 (93)                            | 0.40                     |
| MDD                    | Lifetime Smoking                | 261.97 (34)                           | <0.001                   |
| Lifetime Smoking       | Cardiovascular disease          | 183.08 (119)                          | <0.001                   |



**Table S7. MR Egger Intercept test of directional horizontal pleiotropy for MR univariable analysis.**

| <b>Exposure</b>                          | <b>Outcome</b>                  | <b>MR Egger Intercept</b> | <b>Standard Error</b> | <b>P-value</b> |
|------------------------------------------|---------------------------------|---------------------------|-----------------------|----------------|
| Educational Attainment                   | Cardiovascular Disease          | -0.00144                  | 0.00132               | 0.28           |
|                                          | Mental Health Problems          | -0.000193                 | 0.000286              | 0.50           |
|                                          | Major Depressive Disorder (MDD) | 0.000999                  | 0.00138               | 0.47           |
|                                          | Anxiety                         | -0.00197                  | 0.00378               | 0.60           |
| Mental Health Problems<br>MDD<br>Anxiety | Cardiovascular Disease          | 0.0193                    | 0.0183                | 0.31           |
|                                          |                                 | 0.00729                   | 0.00125               | 0.56           |
|                                          |                                 | -0.000687                 | 0.00293               | 0.82           |
| MDD                                      | Lifetime Smoking                | 0.00367                   | 0.00479               | 0.45           |
| Lifetime Smoking                         | Cardiovascular Disease          | 0.0122                    | 0.00496               | 0.02           |

**Table S8. Results of MR univariable analysis utilising personality traits.**

| <b>Exposure</b>        | <b>Outcome</b>   | <b>Method</b>                   | <b>SNPs</b>     | <b>OR (95% CI)</b> | <b>P-value</b>         |                       |
|------------------------|------------------|---------------------------------|-----------------|--------------------|------------------------|-----------------------|
| Educational Attainment | Depressed Affect | Inverse Variance Weighted (IVW) | 1140            | 0.75 (0.73-0.77)   | 1.2x10 <sup>-133</sup> |                       |
|                        |                  | MR Egger                        | 1140            | 0.74 (0.69-0.80)   | 5.9x10 <sup>13</sup>   |                       |
|                        |                  | Weighted Median                 | 1140            | 0.77 (0.59-0.70)   | 1.2x10 <sup>-104</sup> |                       |
|                        |                  |                                 | Weighted Mode   | 1140               | 0.76 (0.67-0.87)       | 6.3x10 <sup>-5</sup>  |
|                        | Worry            |                                 | IVW             | 1140               | 0.92 (0.90-0.94)       | 4.3x10 <sup>-11</sup> |
|                        |                  |                                 | MR Egger        | 1140               | 0.96 (0.88-1.04)       | 0.32                  |
|                        |                  |                                 | Weighted Median | 1140               | 0.92 (0.89-0.94)       | 8.9x10 <sup>-12</sup> |
|                        |                  |                                 | Weighted Mode   | 1140               | 0.87 (0.78-0.98)       | 0.02                  |
|                        | Depressed Affect | Cardiovascular Disease          | IVW             | 54                 | 1.49 (1.18-1.87)       | 0.0007                |
| MR Egger               |                  |                                 | 54              | 1.36 (0.41-4.50)   | 0.61                   |                       |
| Weighted Median        |                  |                                 | 54              | 1.38 (1.07-1.77)   | 0.01                   |                       |
| Weighted Mode          |                  |                                 | 54              | 1.41 (0.79-2.52)   | 0.26                   |                       |
| Worry                  |                  | IVW                             | 54              | 0.95 (0.75-1.21)   | 0.68                   |                       |
|                        |                  | MR Egger                        | 54              | 0.65 (0.18-2.36)   | 0.51                   |                       |
|                        |                  | Weighted Median                 | 54              | 1.08 (0.83-1.41)   | 0.55                   |                       |
|                        |                  | Weighted Mode                   | 54              | 1.14 (0.64-2.01)   | 0.66                   |                       |

**Table S9. Results of multivariable MR analysis utilising personality traits with odds ratios for each mediator adjusted for effects of exposure presented.**

| <b>Exposure</b>        | <b>Mediator</b>  | <b>Outcome</b>         | <b>OR (95% CI)</b> | <b>P-value</b> |
|------------------------|------------------|------------------------|--------------------|----------------|
| Educational Attainment | Worry            | Cardiovascular Disease | 1.04 (0.97-1.11)   | 0.54           |
|                        | Depressed Affect |                        | 1.10 (0.99-1.21)   | 0.06           |

**Table S10. Cochran's Q Tests of Heterogeneity for multivariate MR analysis.**

| <b>Exposure</b>        | <b>Mediator</b>                 | <b>Outcome</b>         | <b>Q<br/>(Degrees of<br/>freedom)</b> | <b>Q<br/>P-<br/>value</b> |
|------------------------|---------------------------------|------------------------|---------------------------------------|---------------------------|
| Educational Attainment | Major Depressive Disorder (MDD) | Cardiovascular Disease | 1534 (1269)                           | <0.001                    |
|                        | Anxiety                         |                        | 1677 (1271)                           | <0.001                    |
|                        | Mental Health Problems          |                        | 1782 (1329)                           | <0.001                    |
| Educational Attainment | MDD                             | Lifetime Smoking       | 3129 (1084)                           | <0.001                    |
| MDD                    | Lifetime Smoking                | Cardiovascular Disease | 189 (141)                             | <0.01                     |

**Table S11. MR Egger Intercept test of directional horizontal pleiotropy for MR multivariable analysis.**

| <b>Exposure</b>        | <b>Mediator</b>                 | <b>Outcome</b>         | <b>MR Egger Intercept</b> | <b>Standard Error</b> | <b>P-value</b> |
|------------------------|---------------------------------|------------------------|---------------------------|-----------------------|----------------|
| Educational Attainment | Mental Health Problems          | Cardiovascular Disease | 0.00104                   | 0.000532              | 0.05           |
|                        | Major Depressive Disorder (MDD) |                        | 0.000555                  | 0.000357              | 0.12           |
|                        | Anxiety                         |                        | 0.000405                  | 0.000354              | 0.25           |
| Educational Attainment | MDD                             | Lifetime Smoking       | 0.0000204                 | 0.0000851             | 0.81           |
| MDD                    | Lifetime Smoking                | Cardiovascular Disease | 0.00236                   | 0.00102               | 0.02           |

**Table S12. The MR Egger mF statistic as a test of instrument strength in MR multivariable analysis.**

| <b>Exposures</b>       | <b>Mediator</b>                 | <b>Outcome</b>         | <b>mF</b> | <b>P-value</b> |
|------------------------|---------------------------------|------------------------|-----------|----------------|
| Educational Attainment | Mental Health Problems          | Cardiovascular disease | 60.81     | <0.001         |
|                        | Major Depressive Disorder (MDD) |                        | 117.9     | <0.001         |
|                        | Anxiety                         |                        | 113.4     | <0.001         |
| Educational Attainment | MDD                             | Lifetime Smoking       | 533.9     | <0.001         |
| MDD                    | Lifetime Smoking                | Cardiovascular disease | 19.8      | <0.001         |

**Table S13. Results of MR univariable analysis of personality traits.**

| <b>Exposure</b>        | <b>Outcome</b>         | <b>Method</b>                   | <b>SNPs</b> | <b>OR (95% CI)</b> | <b>P-value</b>         |
|------------------------|------------------------|---------------------------------|-------------|--------------------|------------------------|
| Educational Attainment | Depressed Affect       | Inverse Variance Weighted (IVW) | 1140        | 0.75 (0.73-0.77)   | 1.2x10 <sup>-133</sup> |
|                        |                        | MR Egger                        | 1140        | 0.74 (0.69-0.80)   | 5.9x10 <sup>13</sup>   |
|                        |                        | Weighted Median                 | 1140        | 0.77 (0.59-0.70)   | 1.2x10 <sup>-104</sup> |
|                        |                        | Weighted Mode                   | 1140        | 0.76 (0.67-0.87)   | 6.3x10 <sup>-5</sup>   |
| Educational Attainment | Worry                  | IVW                             | 1140        | 0.92 (0.90-0.94)   | 4.3x10 <sup>-11</sup>  |
|                        |                        | MR Egger                        | 1140        | 0.96 (0.88-1.04)   | 0.32                   |
|                        |                        | Weighted Median                 | 1140        | 0.92 (0.89-0.94)   | 8.9x10 <sup>-12</sup>  |
|                        |                        | Weighted Mode                   | 1140        | 0.87 (0.78-0.98)   | 0.02                   |
| Depressed Affect       | Cardiovascular Disease | IVW                             | 54          | 1.49 (1.18-1.87)   | 0.0007                 |

**Table S14. Results of logistic regression of mental health on cardiovascular disease with adjustment for age, sex and educational attainment only.**

| <b>Mediator</b>           | <b>Outcome</b>         | <b>OR (95% CI)</b> | <b>P-value</b>          |
|---------------------------|------------------------|--------------------|-------------------------|
| Mental health problems    | Cardiovascular disease | 1.54 (1.48-1.60)   | $8.63 \times 10^{-129}$ |
| Major depressive disorder |                        | 2.77 (2.60-2.96)   | $2.60 \times 10^{-212}$ |
| Anxiety disorder          |                        | 2.39 (2.19-2.61)   | $2.27 \times 10^{-84}$  |

\



**Table S15. Results of logistic regression assessing the effect of cardiovascular disease on mental health utilising observational data after adjustment for co-variates.**

| <b>Exposure</b>        | <b>Outcome</b>            | <b>OR (95% CI)</b> | <b>P-value</b>        |
|------------------------|---------------------------|--------------------|-----------------------|
| Cardiovascular Disease | Mental Health Problems    | 1.23 (1.19-1.26)   | $1.2 \times 10^{-31}$ |
|                        | Anxiety Disorder          | 1.55 (1.40-1.72)   | $3.5 \times 10^{-21}$ |
|                        | Major Depressive Disorder | 1.57 (1.46-1.68)   | $9.1 \times 10^{-38}$ |

**Figure S1. Results of univariable observational and MR analyses investigating association of depression with lifetime smoking index (LSI).**

| Exposure   | Outcome | Method        | Mean Difference (95% CI) | P-Value |
|------------|---------|---------------|--------------------------|---------|
| Depression | LSI     | Observational | +0.23 (0.22, 0.24)       | <0.0001 |
|            |         | MR            | +0.04 (0.03, 0.05)       | <0.01   |

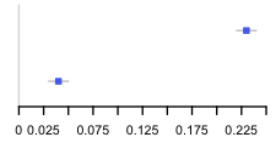

**Figure S2. Results of multivariable observational and MR analyses investigating association of lifetime smoking with cardiovascular disease having adjusted for depression.**

| Mediator | Outcome | Method        | OR (95% CI)       | P-Value |
|----------|---------|---------------|-------------------|---------|
| LSI      | CVD     | Observational | 1.32 (1.29, 1.34) | <0.0001 |
|          |         | MR            | 1.87 (1.49, 2.36) | <0.0001 |

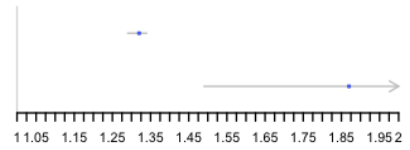

**Figure S3. Plot of MR leave-one-out analysis of educational attainment and cardiovascular disease.**

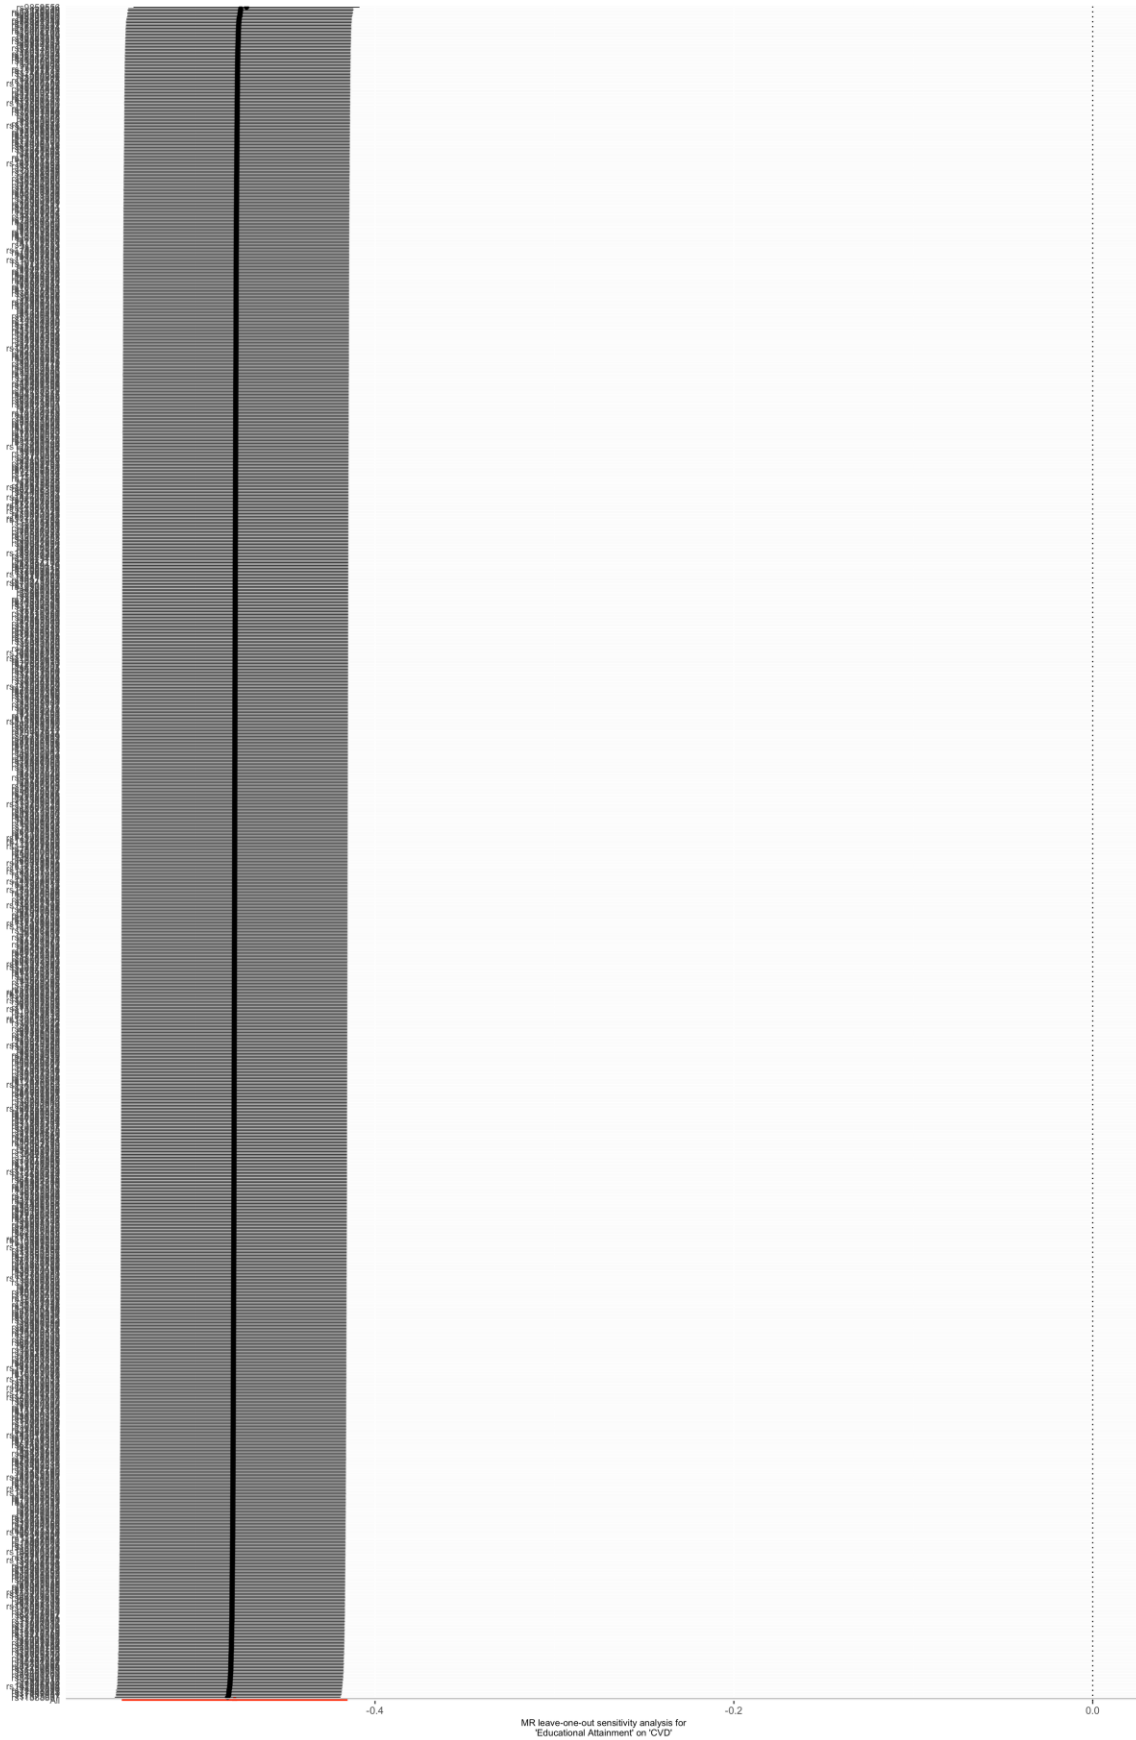

**Figure S4. Scatter plot of MR analysis of educational attainment and cardiovascular disease.**

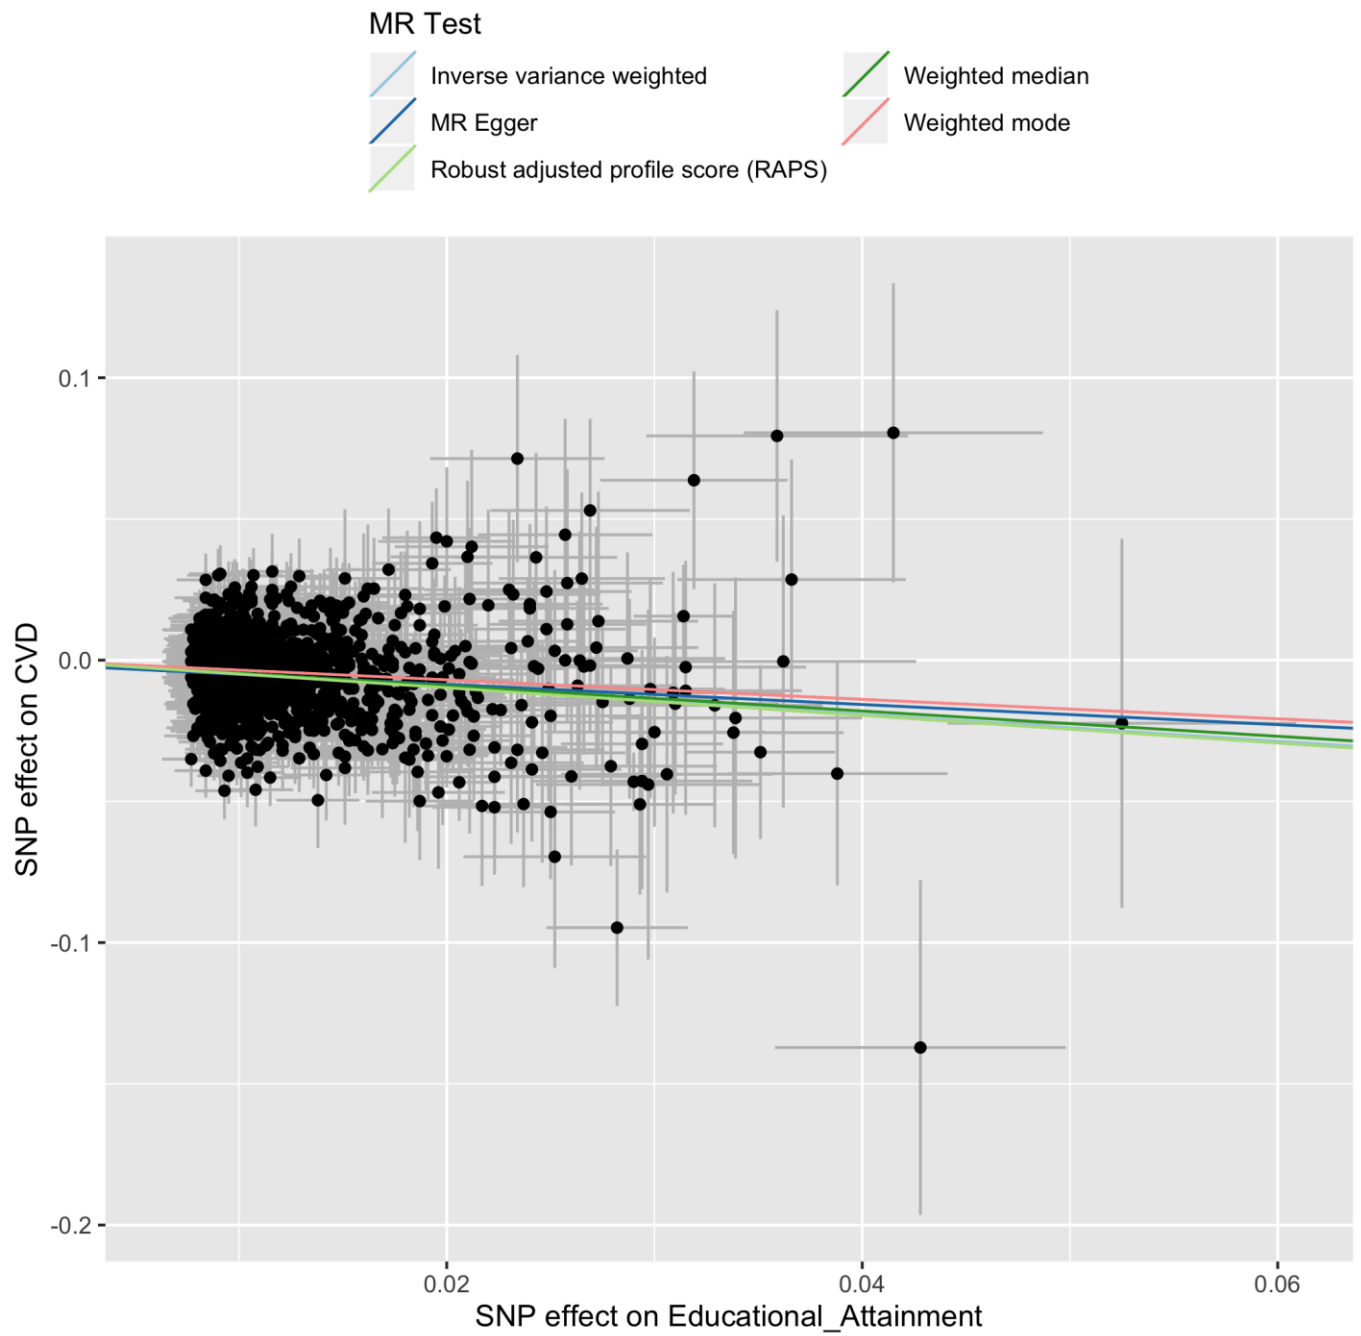

**Figure S5. Plot of MR leave-one-out analysis of educational attainment and mental health problems.**

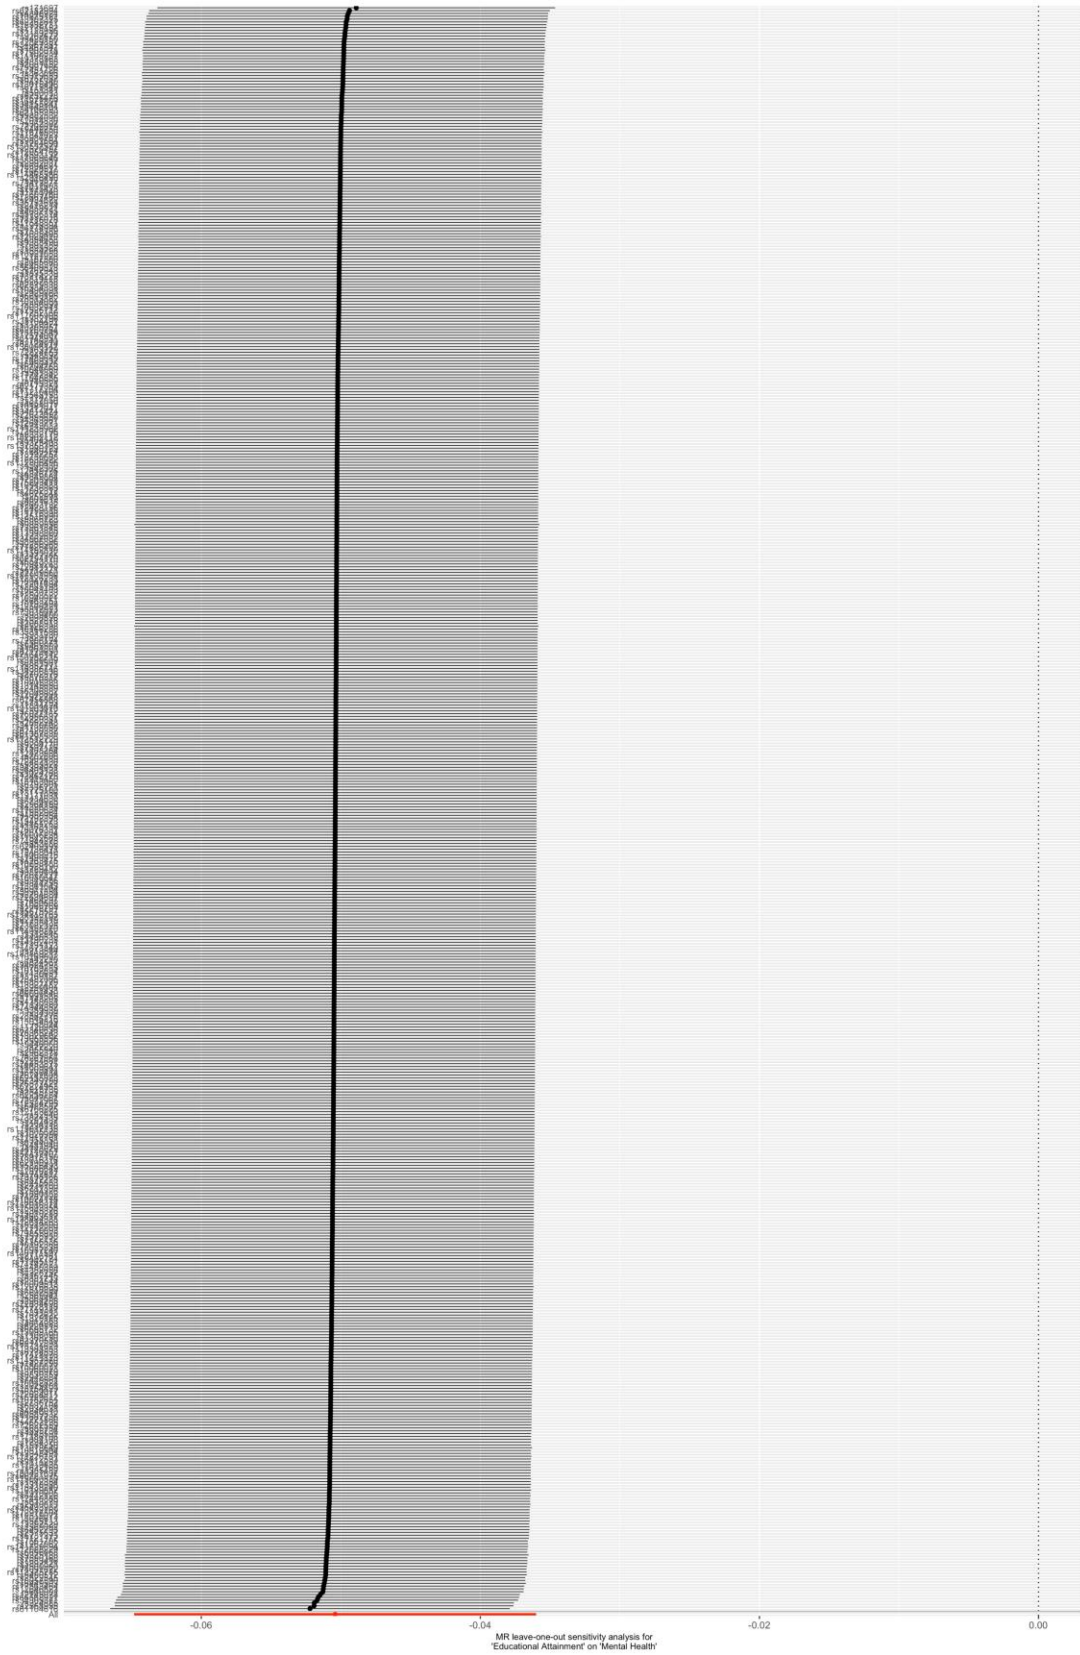

**Figure S6. Scatter plot of MR analysis of educational attainment and mental health problems.**

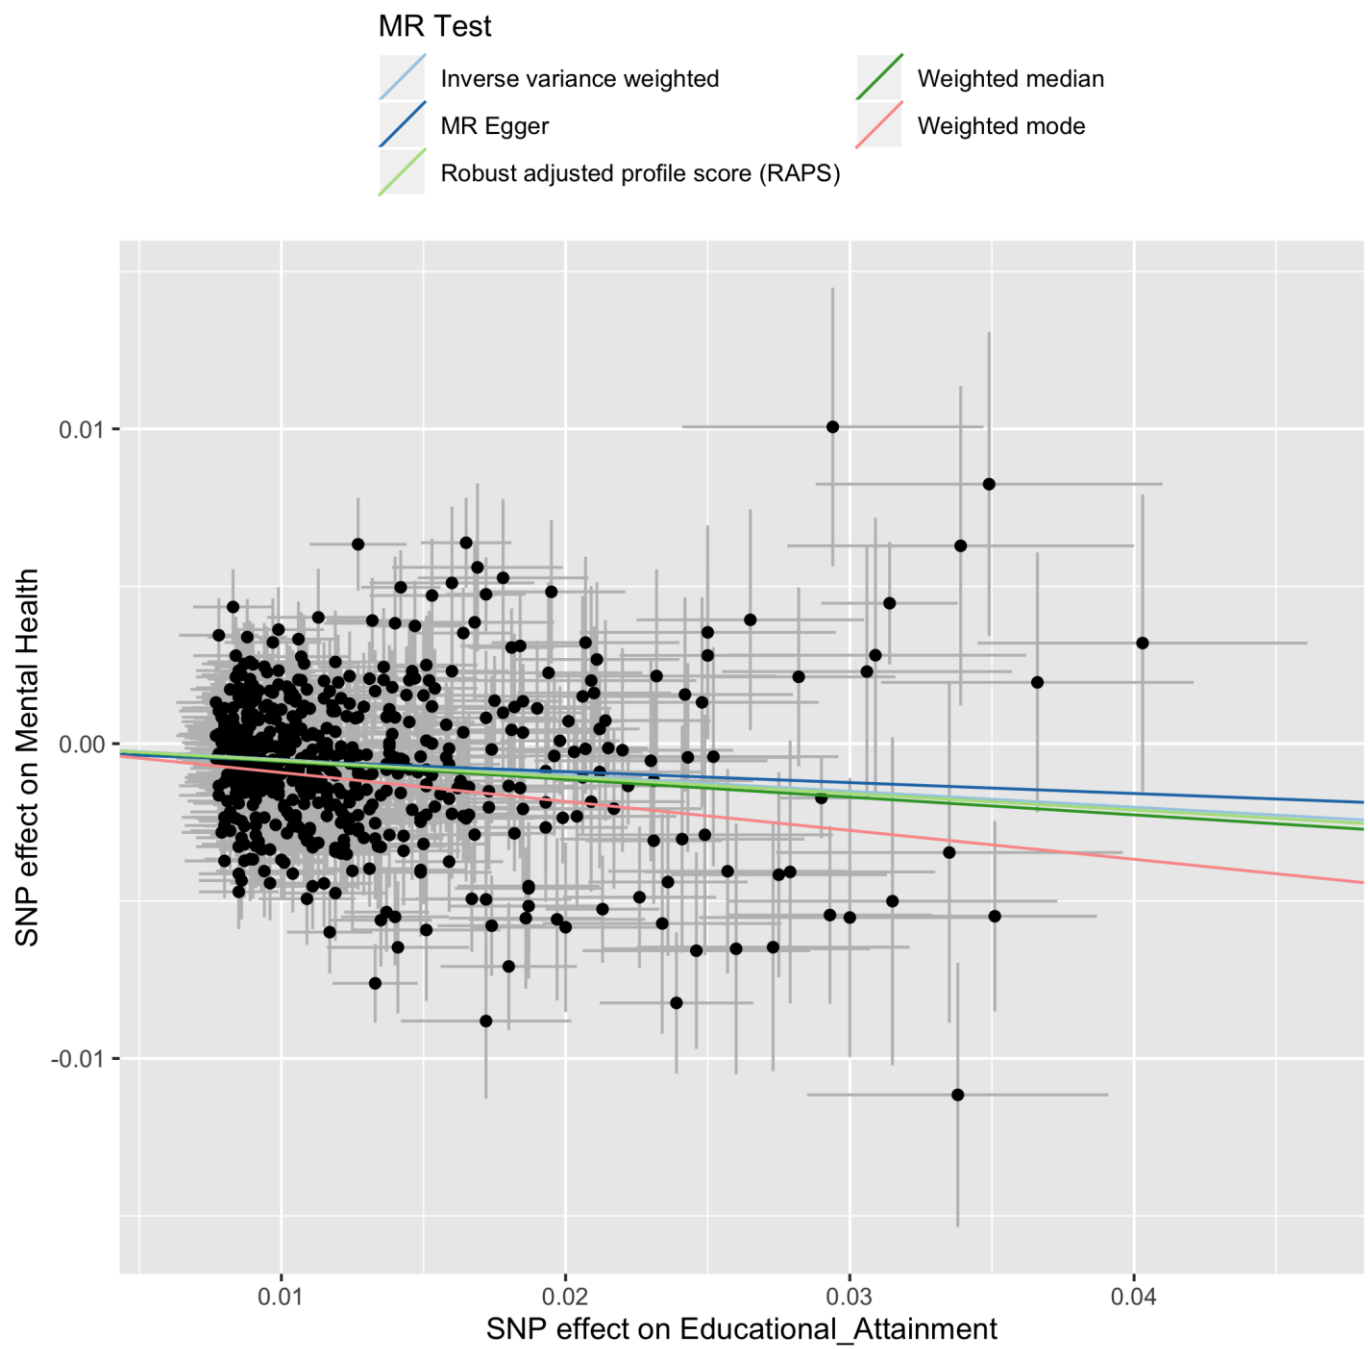

**Figure S7. Plot of MR leave-one-out analysis of educational attainment and depression.**

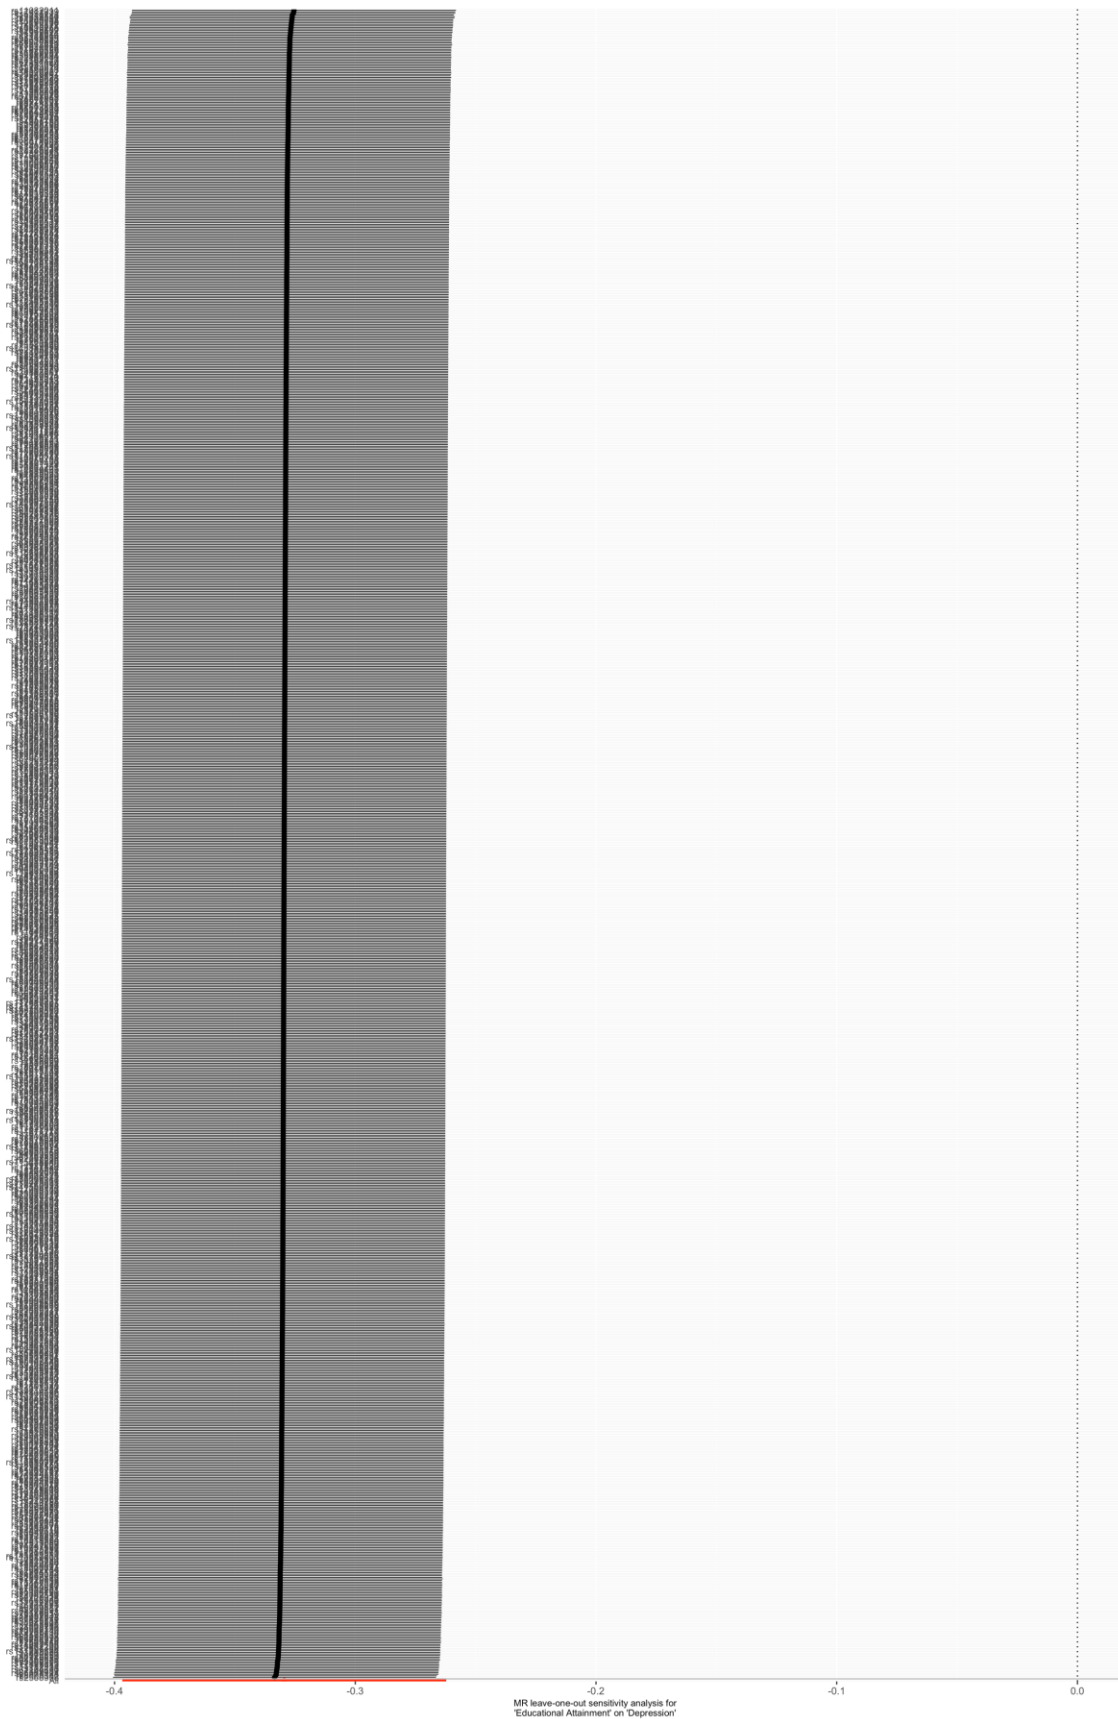



**Figure S8. Scatter plot of MR analysis of educational attainment and depression.**

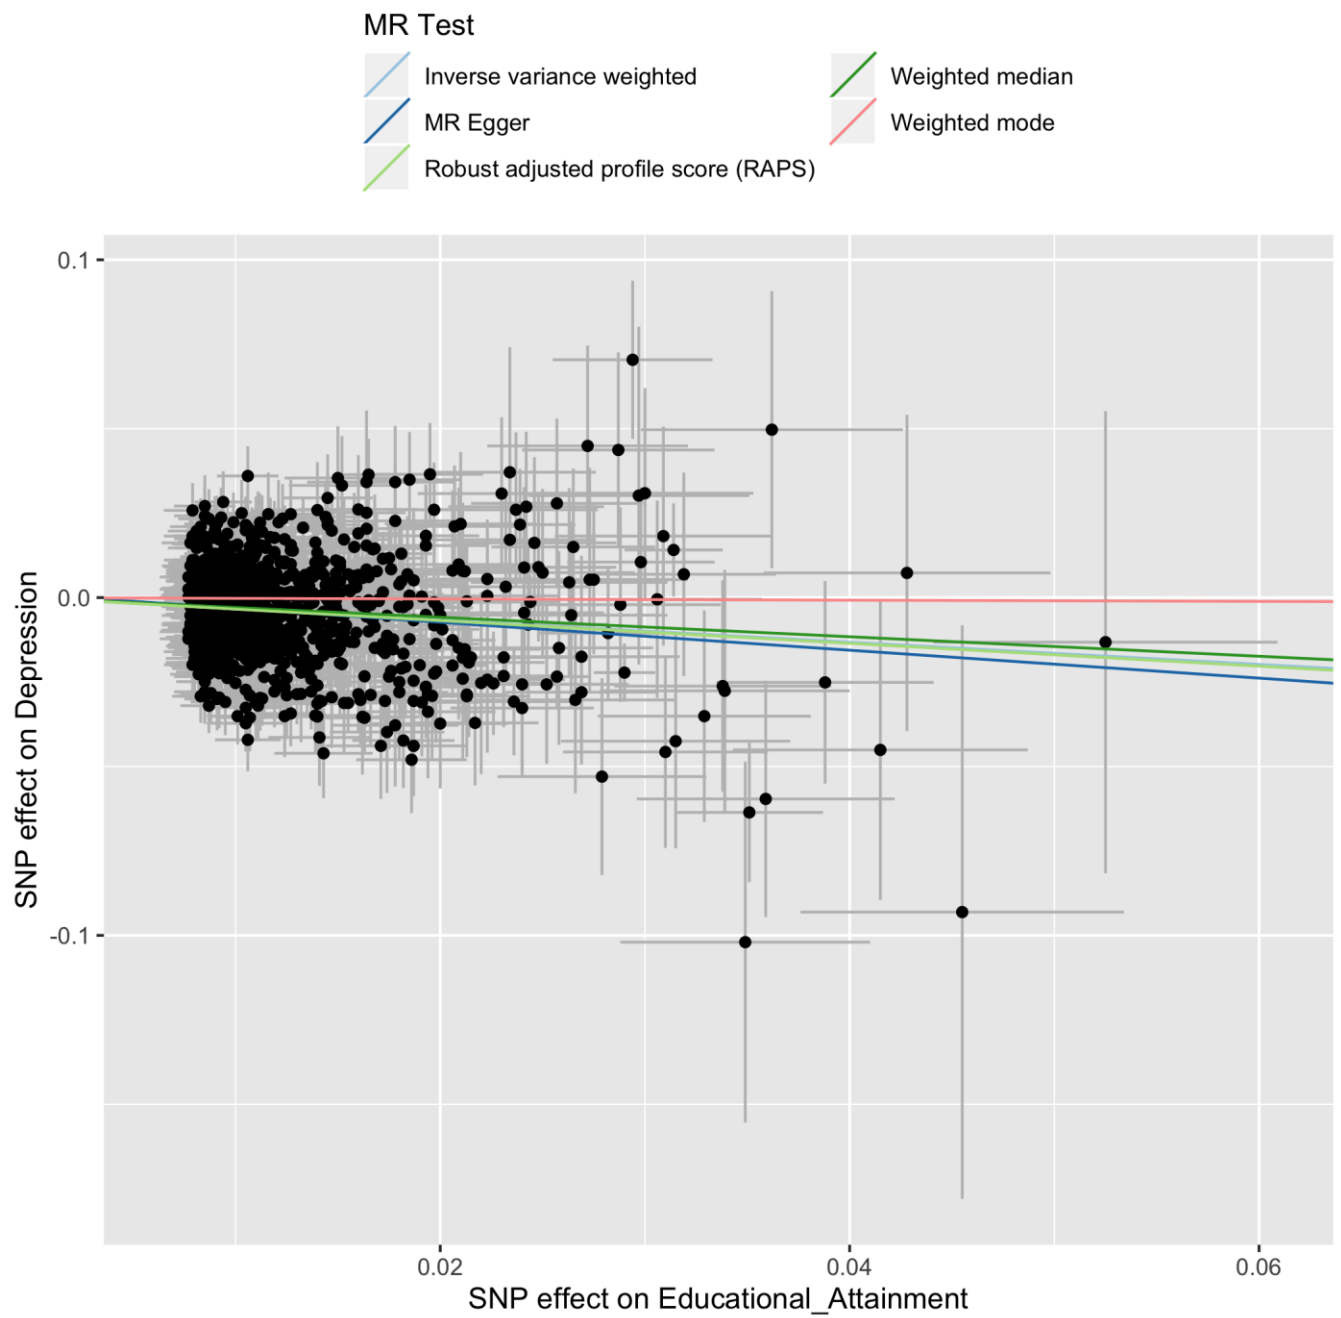

**Figure S9. Plot of MR leave-one-out analysis of depression and lifetime smoking.**

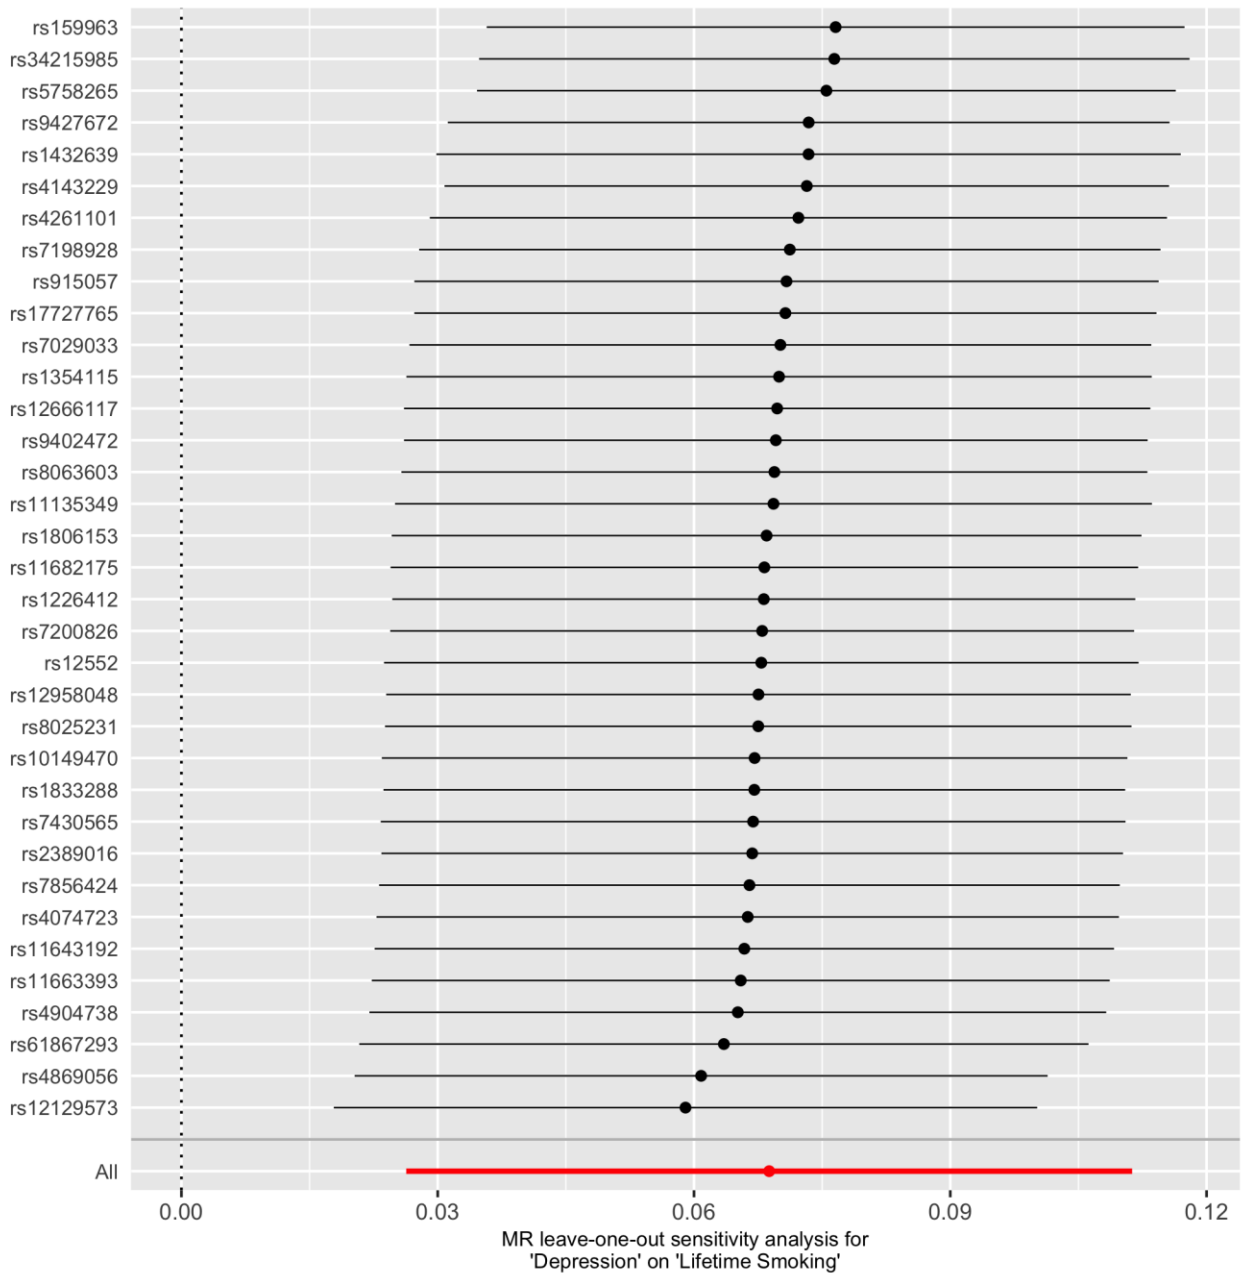

**Figure S10. Scatter plot of MR analysis of depression and lifetime smoking.**

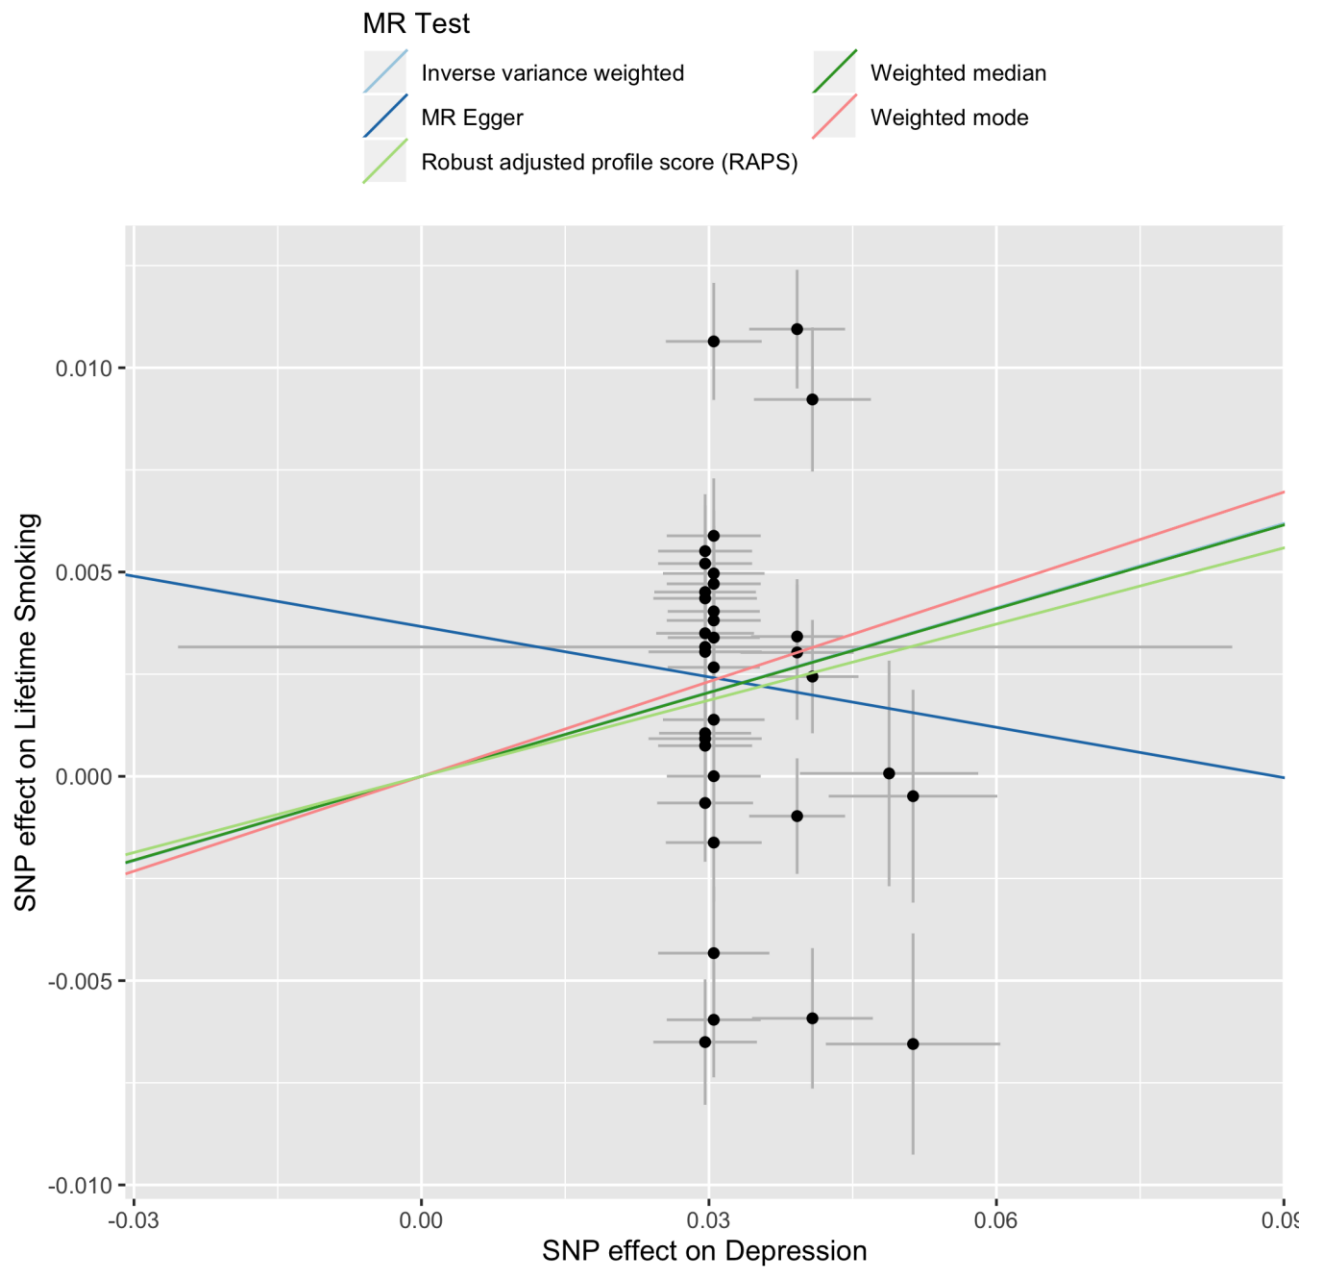

Figure S11. Plot of MR leave-one-out analysis of lifetime smoking and cardiovascular disease.

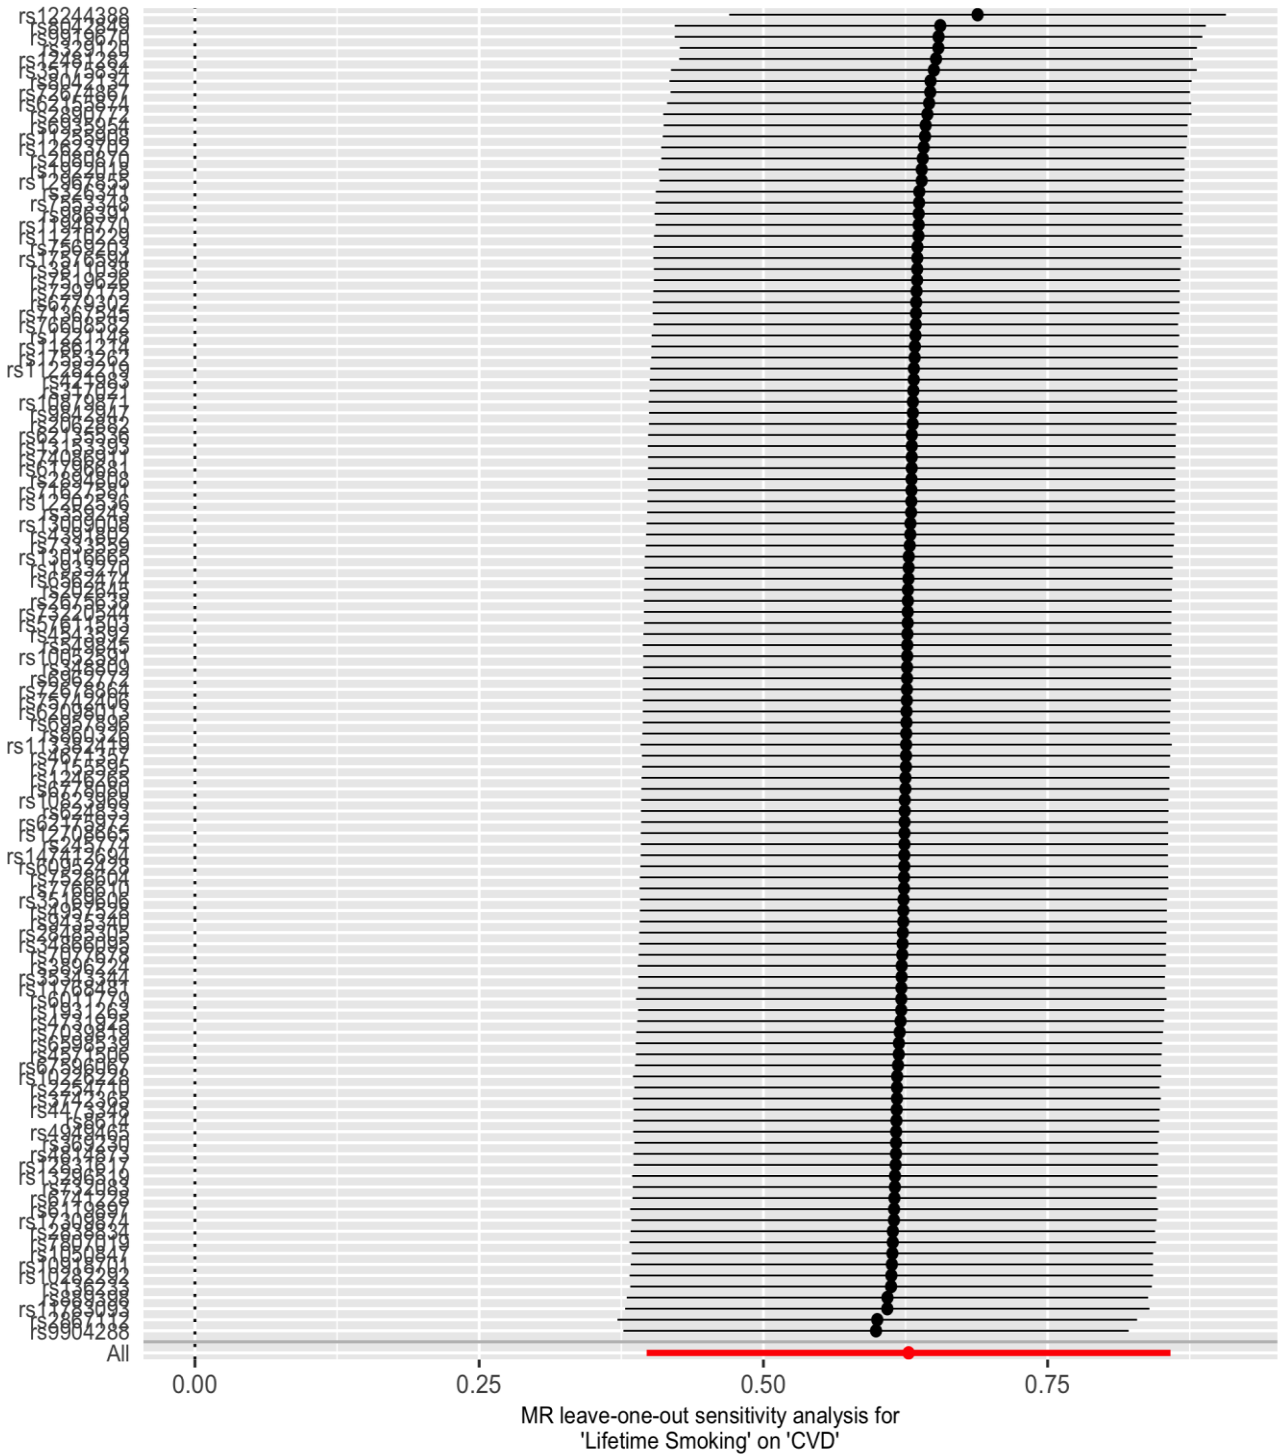

**Figure S12. Scatter plot of MR analysis of lifetime smoking and cardiovascular disease.**

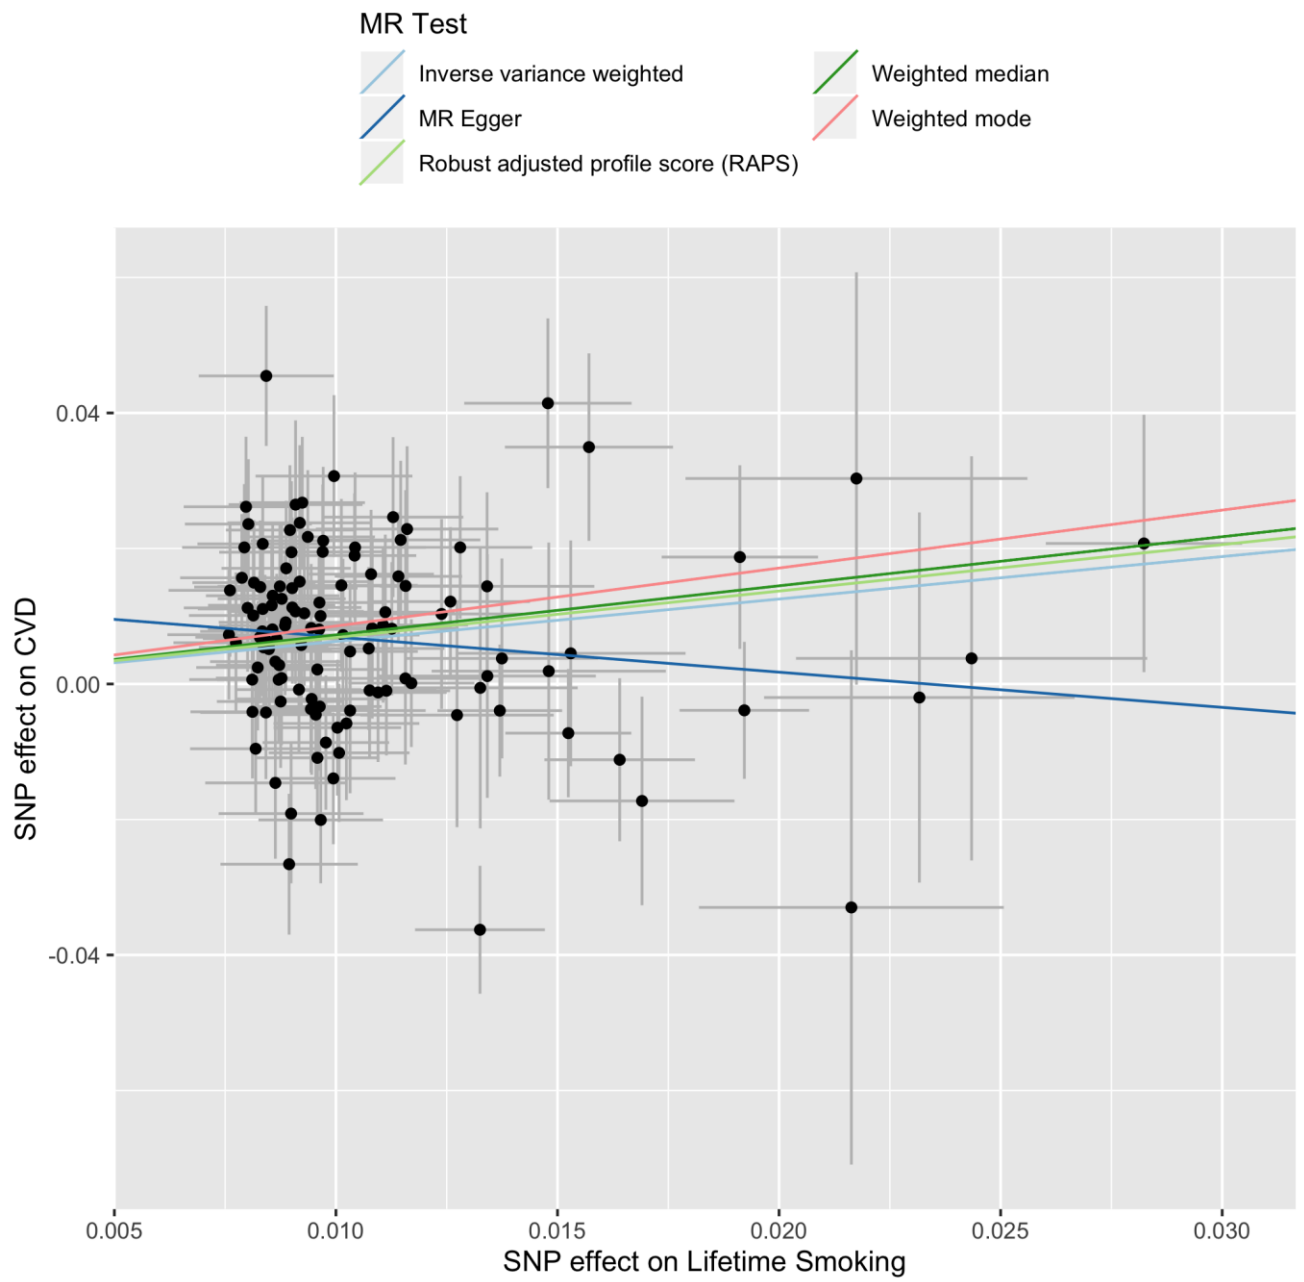

Supplement: JAH3-10-e019340-s001.pdf [file JAH3-10-e019340-s001.pdf]
